# Supplementary material for: The Pretreatment of Micro-Polluted Source Water through Phototrophic Biofilms under Variant Light Conditions
Source: MDPI journal article supplement (doi:10.3390/w15040621), 2023-02-05
Supplement: s1 [file s1]

## **Supplementary Material**

### **The pretreatment of micro-polluted source water through phototrophic biofilms under variant light conditions**

Hong-Yi Li<sup>1\*</sup>, Runze Xu<sup>2,3\*</sup>, Ting-Feng Liu<sup>1</sup>, Zhi-Xin Hu<sup>1</sup>

<sup>1</sup>School of Environmental Engineering, Nanjing Institute of Technology, Nanjing  
211167, China

<sup>2</sup>Key Laboratory of Integrated Regulation and Resource Development on Shallow  
Lakes, Ministry of Education, Hohai University, Nanjing 210098, China.

<sup>3</sup>College of Environment, Hohai University, Nanjing 210098, China

#### **\* Corresponding authors:**

\*Hong-Yi Li, E-mail: [hjliahongyi@njit.edu.cn](mailto:hjliahongyi@njit.edu.cn);

\*Run-Ze Xu, E-mail: [runzexu@hhu.edu.cn](mailto:runzexu@hhu.edu.cn).

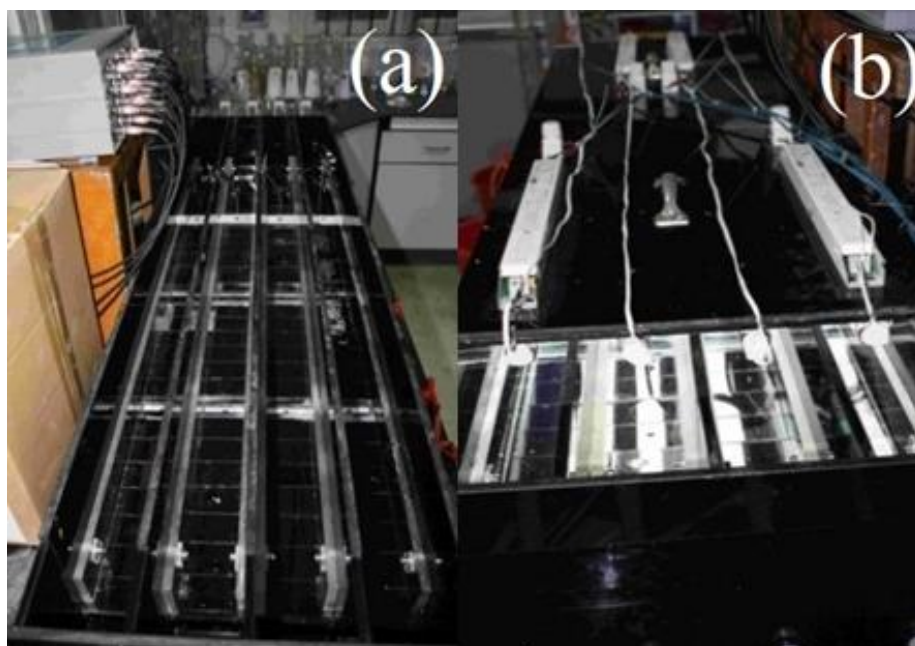

**Figure S1** The prototype of the photobioreactor used to culture the phototrophic biofilms: (a) the flow lane of photobioreactor, (b) dimming device.

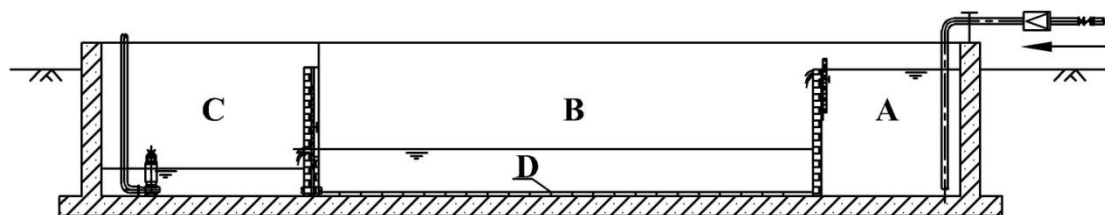

A. Pre-sedimentation zone B.Reaction zone C. Drainage zone D.Flat carrier

**Figure S2** The schematic of pilot-scale equipment for cultivating phototrophic biofilms.

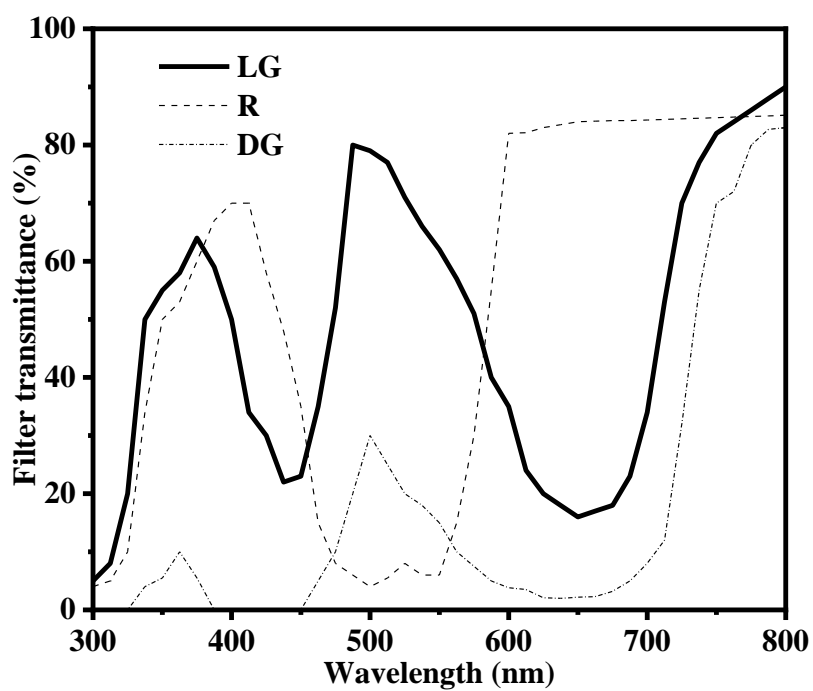

**Figure S3** The transmittance of different light filter membranes. LG: light green, R: red, DG: dark green.

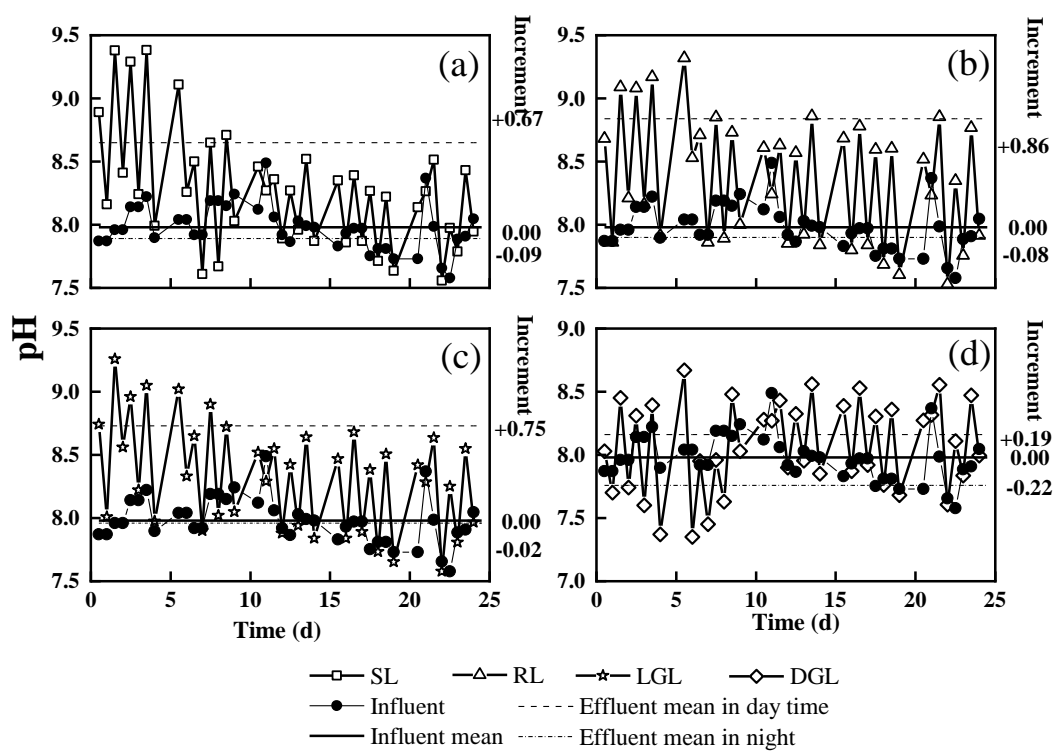

**Figure S4** The fluctuation of pH in effluent under four light spectra: (a) sunlight (SL), (b) red light (RL), (c) light green light (LGL), (d) dark green light (DGL). The pH value was directly recorded from pH equipment without error bar.

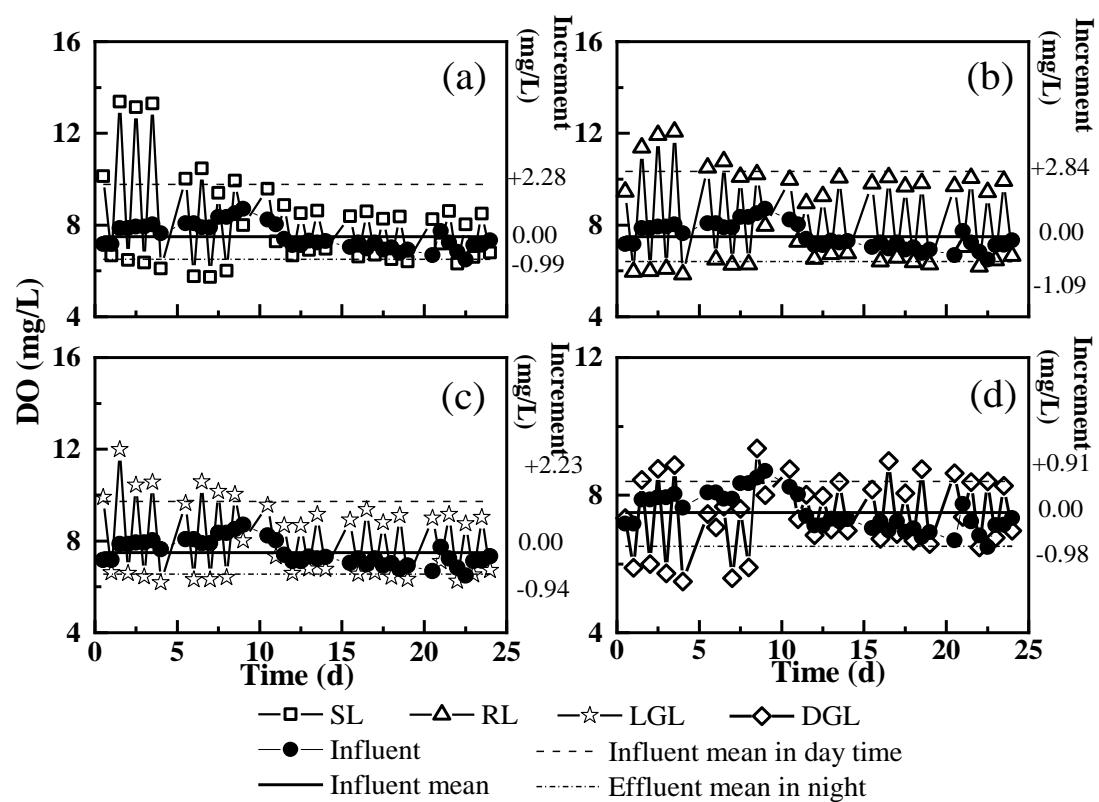

**Figure S5** The fluctuation of DO in effluent under four light spectra: (a) sunlight (SL), (b) red light (RL), (c) light green light (LGL), (d) dark green light (DGL). The DO value was directly recorded from DO equipment without error bar.

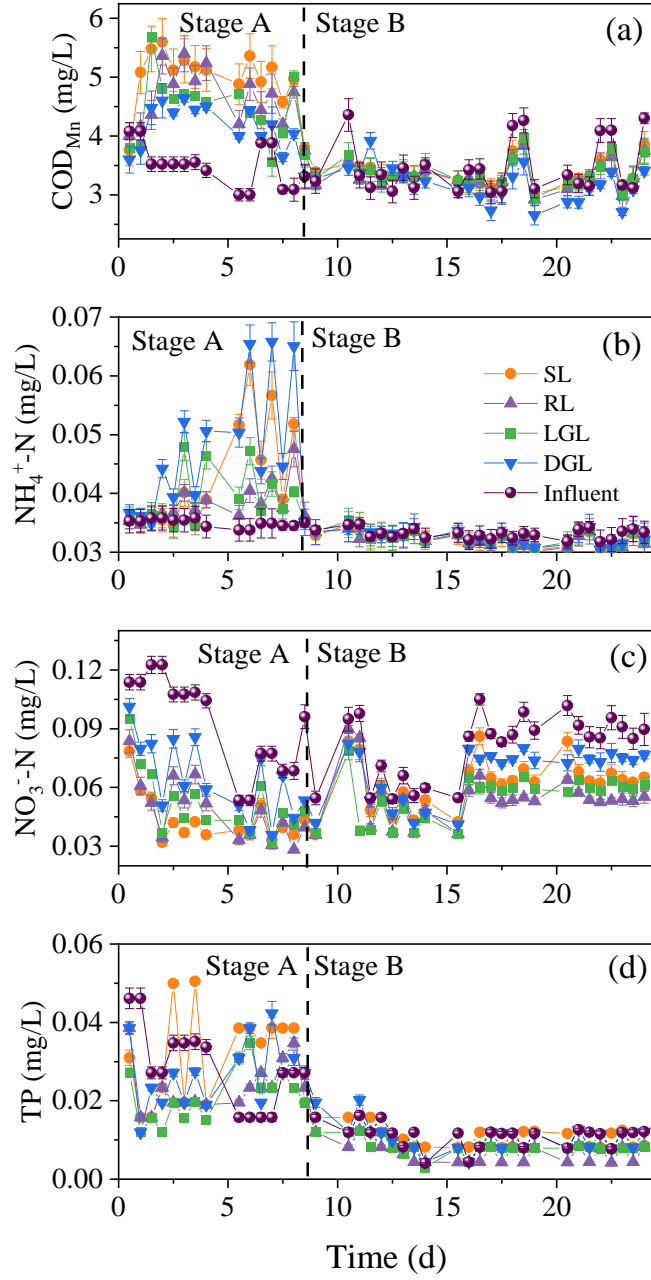

**Figure S6** The pretreatment results of actual micro-polluted water collected from TaiHu: (a)  $\text{COD}_{\text{Mn}}$ , (b)  $\text{NH}_4^+\text{-N}$ , (c)  $\text{NO}_3^-\text{-N}$ , (d) TP. SL: sunlight, RL: red light, LGL: light green light, DGL: dark green light.

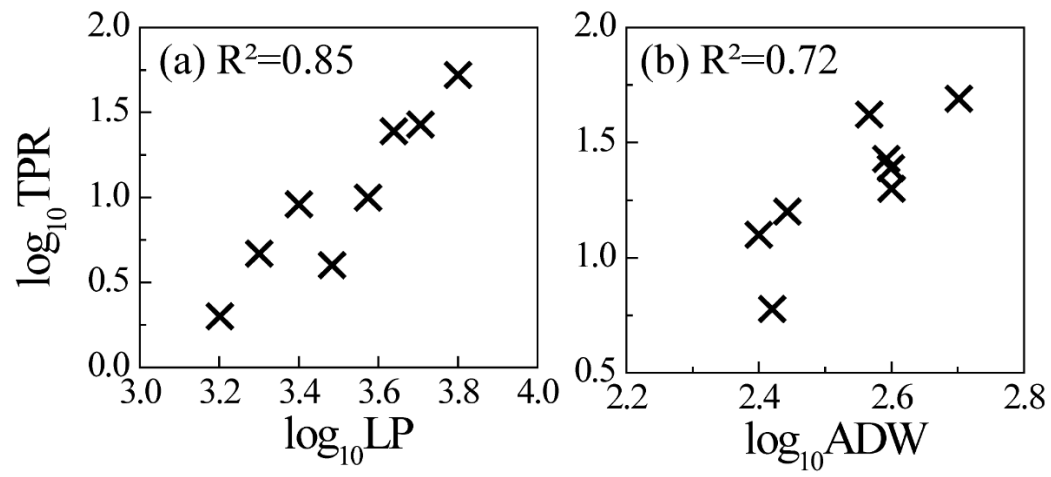

**Figure S7** The correlation scatter plot for TP. (a) TP removal rate (TPR) vs biofilm lipid phosphorus (LP), (b) TPR vs ash-free dry weight (ADW).
